# Supplementary material for: A machine learning-based clinical tool for diagnosing myopathy using multi-cohort microarray expression profiles
Source: Springer Nature journal article supplement (doi:10.1186/s12967-020-02630-3), 2020-11-30
Supplement: MOESM2 [file 18641996]

**Supplemental Digital Content 2:** Summary of gene expression datasets used in the study.

| <b>Reference</b> | <b>Cohort</b> | <b>Disease</b> | <b>Controls</b> | <b>Cases</b> | <b>Total</b> | <b>Platform</b> |
|------------------|---------------|----------------|-----------------|--------------|--------------|-----------------|
| Arashiro         | GSE15090      | Congenital     | 5               | 5            | 10           | GPL570          |
| Perfetti         | GSE37084      | Congenital     | 10              | 10           | 20           | GPL5175         |
| Rahimov          | GSE36398a     | Congenital     | 16              | 8            | 24           | GPL6244         |
| Rahimov          | GSE36398b     | Congenital     | 8               | 10           | 18           | GPL6244         |
| Dorsey           | GSE38417      | Congenital     | 6               | 16           | 22           | GPL570          |
| Tasca            | GSE26852      | Congenital     | 7               | 12           | 19           | GPL6947         |
| Nakamori         | GSE47968      | Congenital     | 8               | 23           | 31           | GPL5188         |
| Screen           | GSE42806      | Congenital     | 5               | 7            | 12           | GPL570          |
| Voets            | GSE18715      | Congenital     | 12              | 6            | 18           | GPL570          |
| Bachinski        | GSE13608      | Congenital     | 9               | 59           | 68           | GPL570          |
| Palermo          | GSE38680a     | Congenital     | 7               | 32           | 39           | GPL570          |
| Palermo          | GSE38680b     | Congenital     | 10              | 9            | 19           | GPL570          |
| Dadgar           | GSE109178     | Congenital     | 6               | 42           | 48           | GPL570          |
| Bakay            | GSE3307       | Congenital     | 13              | 66           | 79           | GPL570          |
| Pescatori        | GSE6011       | Congenital     | 14              | 23           | 37           | GPL96           |
| Eisenberg        | GSE12648      | Congenital     | 10              | 10           | 20           | GPL96           |
| Osborne          | GSE10760      | Congenital     | 60              | 38           | 98           | GPL96           |
| Saenz            | GSE11681      | Congenital     | 10              | 10           | 20           | GPL96           |
| Zhu              | GSE39454      | Infmyo         | 5               | 31           | 36           | GPL570          |
| Surez-Calvet     | GSE48280      | Infmyo         | 5               | 14           | 19           | GPL6244         |
| Tasca            | GSE26852      | Infmyo         | 7               | 7            | 14           | GPL6947         |
| Greenberg        | GSE3112       | Infmyo         | 11              | 29           | 40           | GPL96           |
| Bakay            | GSE3307       | Infmyo         | 13              | 21           | 34           | GPL96           |
| Greenberg        | GSE1551       | Infmyo         | 10              | 13           | 23           | GPL96           |
| Bernasconi       | EMEXP2681     | Infmyo         | 7               | 8            | 15           | GPL96           |
| Reich            | GSE21496      | Immobile       | 7               | 7            | 14           | GPL570          |
| Barres           | GSE45745      | Immobile       | 6               | 5            | 11           | GPL13667        |
| Urso             | GSE5110       | Immobile       | 5               | 5            | 10           | GPL570          |
| Rullman          | GSE104999     | Immobile       | 12              | 12           | 24           | GPL17692        |
| Park             | GSE474        | Immobile       | 8               | 16           | 24           | GPL96           |
| Alibegovic       | GSE24215      | Immobile       | 12              | 12           | 24           | GPL6480         |
| Abadi            | GSE14901      | Immobile       | 24              | 48           | 72           | GPL570          |
| Chen             | GSE45462      | Immobile       | 16              | 16           | 32           | GPL570          |
| Bakay            | GSE3307       | ICUAW          | 13              | 5            | 18           | GPL96           |
| Langhans         | GSE53702      | ICUAW          | 6               | 7            | 13           | GPL5188         |
| Fredriksson      | GSE13205      | ICUAW          | 8               | 13           | 21           | GPL570          |
| Walsh            | GSE78929      | ICUAW          | 8               | 24           | 32           | GPL10558        |
| Turan            | GSE27536      | Chronic        | 24              | 30           | 54           | GPL570          |
| Kreiner          | EMTAB3671a    | Chronic        | 12              | 12           | 24           | GPL570          |
| Radom-Aizik      | GSE1786       | Chronic        | 12              | 12           | 24           | GPL96           |
| Gallagher        | GSE34111      | Chronic        | 6               | 12           | 18           | GPL570          |
| Willis-Owen      | GSE100281     | Chronic        | 16              | 79           | 95           | GPL11532        |
| <b>TOTAL</b>     |               |                | 469             | 824          | 1293         |                 |

Abbreviations: Infmyo – inflammatory myositis, ICUAW – intensive care unit acquired weakness.
