# Supplementary material for: A machine learning-based clinical tool for diagnosing myopathy using multi-cohort microarray expression profiles
Source: Springer Nature journal article supplement (doi:10.1186/s12967-020-02630-3), 2020-11-30
Supplement: MOESM3 [file 18641996]

**Supplemental Digital Content 3:** List of 500 genes (gene signature) used to train multiclass support vector machine muscle disease classifier. F-statistic, p-values, and adjusted p-values using the Benjamini-Hochberg correction are reported. A Fisher's exact test was conducted to determine whether the gene signature was enriched with muscle specific genes. This test was conducted by creating 2x2 contingency tables with columns corresponding to gene signature membership and rows corresponding to muscle gene database membership. P-values were calculated under the null hypothesis of independence using a hypergeometric distribution. The muscle gene database used for determining muscle specificity was The Human Protein Atlas skeletal muscle-specific proteome (<https://www.proteinatlas.org/humanproteome/tissue/skeletal%20muscle>).

| Gene     | F-statistic | P-value   | Adjusted P-value | Muscle Specific Gene? (Y/N) |
|----------|-------------|-----------|------------------|-----------------------------|
| C1S      | 26.281      | 0.000e+00 | 0.000e+00        | N                           |
| CD44     | 14.8        | 1.115e-13 | 0.000e+00        | N                           |
| IQGAP1   | 13.31       | 2.694e-12 | 0.000e+00        | N                           |
| CLTC     | 13.217      | 3.286e-12 | 0.000e+00        | N                           |
| PTP4A1   | 12.687      | 1.028e-11 | 0.000e+00        | Y                           |
| BZW1     | 11.257      | 2.244e-10 | 0.000e+00        | N                           |
| ANXA5    | 10.235      | 2.052e-09 | 0.000e+00        | N                           |
| CYB5R3   | 9.322       | 1.488e-08 | 0.000e+00        | N                           |
| S100A10  | 14.801      | 1.114e-13 | 6.177e-14        | N                           |
| PSAP     | 12.677      | 1.049e-11 | 6.177e-14        | N                           |
| SDCBP    | 11.498      | 1.333e-10 | 1.123e-13        | N                           |
| SERPING1 | 14.896      | 9.082e-14 | 2.574e-13        | N                           |
| ANXA1    | 13.869      | 8.136e-13 | 4.752e-13        | N                           |
| HTRA1    | 10.643      | 8.477e-10 | 8.383e-13        | N                           |
| ENO1     | 8.195       | 1.720e-07 | 1.647e-12        | N                           |
| ANXA4    | 11.161      | 2.758e-10 | 2.973e-12        | N                           |
| COL6A3   | 14.419      | 2.511e-13 | 3.634e-12        | N                           |
| ATP6AP2  | 17.007      | 1.110e-15 | 4.753e-12        | N                           |
| LAMP1    | 16.633      | 2.220e-15 | 6.145e-12        | N                           |
| ANXA2    | 22.813      | 0.000e+00 | 1.263e-11        | N                           |
| TIMP1    | 15.682      | 1.710e-14 | 1.410e-11        | N                           |
| HEXB     | 15.405      | 3.075e-14 | 1.410e-11        | N                           |
| CELF2    | 27          | 0.000e+00 | 1.519e-11        | N                           |
| CDKN1A   | 17.602      | 2.220e-16 | 1.519e-11        | N                           |
| RGS2     | 14.666      | 1.485e-13 | 1.653e-11        | N                           |
| S100A13  | 12.869      | 6.946e-12 | 1.711e-11        | N                           |
| CCNG2    | 10.868      | 5.208e-10 | 2.588e-11        | N                           |
| FAM13A   | 11.536      | 1.229e-10 | 3.250e-11        | N                           |
| SAT1     | 18.674      | 0.000e+00 | 3.291e-11        | N                           |
| GADD45A  | 19.58       | 0.000e+00 | 4.460e-11        | Y                           |
| ACTC1    | 22.359      | 0.000e+00 | 4.654e-11        | N                           |
| MN1      | 13.993      | 6.246e-13 | 4.654e-11        | Y                           |
| CILP     | 17.473      | 4.441e-16 | 4.693e-11        | N                           |
| CHRNA1   | 19.218      | 0.000e+00 | 4.712e-11        | Y                           |
| IFI16    | 12.304      | 2.340e-11 | 4.712e-11        | N                           |
| TGFBR2   | 10.471      | 1.230e-09 | 4.827e-11        | N                           |
| CLIC1    | 12.205      | 2.896e-11 | 5.024e-11        | N                           |
| CYFIP1   | 11.979      | 4.722e-11 | 5.803e-11        | N                           |
| CAPN2    | 8.436       | 1.019e-07 | 5.803e-11        | N                           |
| LGALS3   | 10.878      | 5.093e-10 | 6.570e-11        | N                           |
| TUBA1A   | 11.2        | 2.535e-10 | 7.037e-11        | N                           |
| TUBB6    | 13.875      | 8.037e-13 | 8.413e-11        | N                           |
| CETN2    | 14.046      | 5.567e-13 | 1.267e-10        | N                           |

|          |        |           |           |   |
|----------|--------|-----------|-----------|---|
| TUBA1C   | 10.754 | 6.655e-10 | 1.267e-10 | N |
| PRKCQ    | 12.782 | 8.379e-12 | 1.602e-10 | Y |
| CIR      | 17.843 | 2.220e-16 | 1.629e-10 | N |
| OSBPL8   | 15.26  | 4.197e-14 | 1.785e-10 | N |
| CAMK2G   | 14.07  | 5.298e-13 | 1.905e-10 | Y |
| FTL      | 10.304 | 1.765e-09 | 3.514e-10 | N |
| CFH      | 12.238 | 2.698e-11 | 3.865e-10 | N |
| S100A6   | 11.687 | 8.866e-11 | 4.571e-10 | N |
| C3       | 19.093 | 0.000e+00 | 5.497e-10 | N |
| TMEM43   | 11.919 | 5.374e-11 | 5.506e-10 | N |
| NDUFB11  | 14.273 | 3.431e-13 | 5.737e-10 | Y |
| LRRC20   | 9.759  | 5.763e-09 | 6.755e-10 | Y |
| DCUN1D2  | 11.142 | 2.878e-10 | 7.343e-10 | Y |
| COL5A2   | 10.471 | 1.229e-09 | 1.010e-09 | N |
| CTNNA1   | 9.82   | 5.047e-09 | 1.122e-09 | N |
| CNDP2    | 11.479 | 1.390e-10 | 1.259e-09 | N |
| CANX     | 10.534 | 1.073e-09 | 1.259e-09 | N |
| CLIC4    | 9.674  | 6.924e-09 | 1.259e-09 | N |
| SATB1    | 7.818  | 3.901e-07 | 1.259e-09 | N |
| UCKL1    | 14.115 | 4.809e-13 | 1.279e-09 | N |
| CAP1     | 11.781 | 7.240e-11 | 1.460e-09 | N |
| ACTR3    | 9.246  | 1.753e-08 | 1.537e-09 | N |
| TGFBI    | 10.764 | 6.520e-10 | 1.567e-09 | N |
| IL1R1    | 9.543  | 9.210e-09 | 1.961e-09 | N |
| VCAN     | 12.137 | 3.359e-11 | 2.199e-09 | N |
| SCPEP1   | 10.057 | 3.016e-09 | 2.919e-09 | N |
| CD58     | 8.427  | 1.039e-07 | 3.177e-09 | N |
| CBFB     | 11.46  | 1.447e-10 | 3.422e-09 | N |
| ATP1B3   | 10.149 | 2.474e-09 | 3.426e-09 | N |
| LYZ      | 10.666 | 8.064e-10 | 3.463e-09 | N |
| TMSB10   | 12.362 | 2.068e-11 | 3.895e-09 | N |
| B2M      | 11.694 | 8.732e-11 | 4.558e-09 | N |
| DUSP26   | 8.738  | 5.295e-08 | 4.748e-09 | Y |
| DYNC1I2  | 7.947  | 2.951e-07 | 4.956e-09 | N |
| ARPC5    | 7.968  | 2.818e-07 | 5.095e-09 | N |
| PNMA1    | 6.999  | 2.311e-06 | 5.222e-09 | N |
| LUM      | 12.106 | 3.591e-11 | 5.625e-09 | N |
| CFL1     | 9.314  | 1.514e-08 | 7.272e-09 | N |
| IFITM2   | 8.131  | 1.980e-07 | 7.521e-09 | N |
| EFEMP1   | 10.739 | 6.882e-10 | 8.395e-09 | N |
| COX6A2   | 11.278 | 2.143e-10 | 8.446e-09 | Y |
| PHF11    | 11.675 | 9.087e-11 | 8.578e-09 | N |
| NES      | 9.437  | 1.158e-08 | 8.578e-09 | N |
| PON2     | 7.447  | 8.743e-07 | 8.578e-09 | N |
| SH3BGRL  | 8.59   | 7.289e-08 | 8.621e-09 | N |
| SH3BP5   | 11.17  | 2.710e-10 | 8.800e-09 | N |
| SGCA     | 7.799  | 4.069e-07 | 8.800e-09 | Y |
| EIF3D    | 12.923 | 6.189e-12 | 9.044e-09 | N |
| RAB31    | 10.475 | 1.218e-09 | 1.018e-08 | N |
| BZW2     | 9.545  | 9.174e-09 | 1.093e-08 | Y |
| TUBA1B   | 9.893  | 4.307e-09 | 1.143e-08 | N |
| VIM      | 9.215  | 1.878e-08 | 1.160e-08 | N |
| HLA.DPB1 | 7.062  | 2.012e-06 | 1.402e-08 | N |
| YWHAZ    | 10.209 | 2.172e-09 | 1.446e-08 | N |
| LIMA1    | 10.479 | 1.210e-09 | 1.464e-08 | N |
| IDH2     | 16.335 | 4.219e-15 | 1.558e-08 | Y |
| GNS      | 10.349 | 1.600e-09 | 1.588e-08 | N |
| DYNLL1   | 8.666  | 6.179e-08 | 1.778e-08 | N |
| ZFP36L1  | 13.961 | 6.681e-13 | 1.798e-08 | N |

|          |        |           |           |   |
|----------|--------|-----------|-----------|---|
| MGP      | 10.68  | 7.822e-10 | 1.841e-08 | N |
| ANGPTL2  | 13.457 | 1.964e-12 | 2.027e-08 | N |
| PREPL    | 11.443 | 1.502e-10 | 2.039e-08 | N |
| ARHGAP1  | 8.321  | 1.309e-07 | 2.039e-08 | N |
| MACF1    | 11.51  | 1.297e-10 | 2.077e-08 | N |
| GBP2     | 12.227 | 2.766e-11 | 2.127e-08 | N |
| MAPRE1   | 7.837  | 3.747e-07 | 2.144e-08 | N |
| ZFP36L2  | 7.205  | 1.478e-06 | 2.192e-08 | N |
| RND3     | 10.679 | 7.843e-10 | 2.307e-08 | N |
| HIGD2A   | 9.159  | 2.118e-08 | 2.412e-08 | N |
| PITPNB   | 8.415  | 1.068e-07 | 2.618e-08 | N |
| LAMA2    | 13.448 | 2.004e-12 | 2.843e-08 | N |
| PRKAR1A  | 8.822  | 4.410e-08 | 2.843e-08 | N |
| TUBB2A   | 8.477  | 9.326e-08 | 2.843e-08 | N |
| MSN      | 8.04   | 2.411e-07 | 2.843e-08 | N |
| GSN      | 7.673  | 5.346e-07 | 2.843e-08 | N |
| PDCD6IP  | 6.361  | 9.176e-06 | 2.843e-08 | N |
| PRNP     | 8.64   | 6.539e-08 | 2.920e-08 | N |
| CTSB     | 7.62   | 6.000e-07 | 3.287e-08 | N |
| MFN2     | 14.027 | 5.806e-13 | 3.337e-08 | Y |
| CAPRN2   | 14.295 | 3.271e-13 | 3.533e-08 | N |
| ARHGDIB  | 7.451  | 8.658e-07 | 3.604e-08 | N |
| COL6A1   | 9.553  | 9.015e-09 | 3.836e-08 | N |
| RPL3L    | 14.727 | 1.303e-13 | 4.120e-08 | Y |
| RPS27L   | 14.017 | 5.929e-13 | 4.183e-08 | N |
| FBLN5    | 7.941  | 2.990e-07 | 4.358e-08 | N |
| PTEN     | 10.479 | 1.208e-09 | 4.533e-08 | N |
| EPM2A    | 9.879  | 4.434e-09 | 4.533e-08 | Y |
| LASP1    | 8.642  | 6.522e-08 | 4.533e-08 | N |
| ATP1A1   | 8.811  | 4.510e-08 | 5.098e-08 | N |
| COL1A1   | 9.898  | 4.263e-09 | 5.341e-08 | N |
| THBS4    | 8.027  | 2.481e-07 | 5.689e-08 | Y |
| TRAM1    | 10.268 | 1.910e-09 | 5.875e-08 | N |
| HIF1A    | 10.037 | 3.149e-09 | 5.941e-08 | N |
| PPT1     | 8.023  | 2.500e-07 | 5.941e-08 | N |
| RAD23A   | 8.897  | 3.744e-08 | 5.952e-08 | Y |
| IFITM1   | 8.811  | 4.512e-08 | 7.166e-08 | N |
| APLP2    | 8.18   | 1.778e-07 | 8.235e-08 | N |
| CST3     | 6.917  | 2.758e-06 | 8.264e-08 | N |
| GOT2     | 14.724 | 1.310e-13 | 8.449e-08 | Y |
| CREG1    | 7.172  | 1.587e-06 | 8.948e-08 | N |
| HLA.DPA1 | 8.373  | 1.169e-07 | 9.041e-08 | N |
| ATP5D    | 9.819  | 5.061e-09 | 9.387e-08 | N |
| TRIP10   | 9.553  | 9.015e-09 | 9.387e-08 | Y |
| CD81     | 8.778  | 4.850e-08 | 9.839e-08 | N |
| MAPK1    | 11.124 | 2.991e-10 | 1.033e-07 | N |
| ACLY     | 7.238  | 1.376e-06 | 1.041e-07 | N |
| LRP10    | 9.481  | 1.052e-08 | 1.133e-07 | N |
| RNF123   | 11.027 | 3.692e-10 | 1.170e-07 | Y |
| ARHGEF6  | 10.467 | 1.240e-09 | 1.170e-07 | N |
| DSTN     | 7.229  | 1.403e-06 | 1.219e-07 | N |
| SEPT9    | 8.032  | 2.451e-07 | 1.333e-07 | N |
| HRASLS   | 8.765  | 4.989e-08 | 1.522e-07 | Y |
| UBE2D1   | 8.838  | 4.257e-08 | 1.548e-07 | Y |
| SRGN     | 8.47   | 9.468e-08 | 1.548e-07 | N |
| PGAM2    | 12.09  | 3.717e-11 | 1.553e-07 | Y |
| GPD1L    | 9.791  | 5.376e-09 | 1.553e-07 | Y |
| NQO1     | 7.148  | 1.673e-06 | 1.553e-07 | N |
| IRAK1    | 8.263  | 1.484e-07 | 1.592e-07 | N |

|          |        |           |           |   |
|----------|--------|-----------|-----------|---|
| HPRT1    | 8.891  | 3.795e-08 | 1.725e-07 | N |
| SRP72    | 10.257 | 1.955e-09 | 1.742e-07 | N |
| ARL6IP5  | 8.449  | 9.915e-08 | 1.817e-07 | N |
| MACROD1  | 9.06   | 2.627e-08 | 1.885e-07 | Y |
| GMFB     | 6.771  | 3.786e-06 | 1.885e-07 | N |
| GNG12    | 8.907  | 3.663e-08 | 2.407e-07 | N |
| TM9SF2   | 6.352  | 9.372e-06 | 2.434e-07 | N |
| DPT      | 10.206 | 2.183e-09 | 2.446e-07 | N |
| PPP4R1   | 11.169 | 2.713e-10 | 2.476e-07 | N |
| MTSS1    | 13.328 | 2.592e-12 | 2.478e-07 | N |
| PFKFB1   | 8.554  | 7.886e-08 | 2.531e-07 | Y |
| PYGM     | 10.989 | 4.002e-10 | 2.718e-07 | Y |
| SMARCA4  | 10.209 | 2.171e-09 | 2.725e-07 | N |
| ARMCX1   | 11.064 | 3.404e-10 | 2.902e-07 | N |
| TFPI     | 9.965  | 3.683e-09 | 3.256e-07 | N |
| TM9SF3   | 9.286  | 1.610e-08 | 4.138e-07 | N |
| LMCD1    | 9.566  | 8.753e-09 | 4.248e-07 | Y |
| PTPN3    | 14.065 | 5.353e-13 | 4.597e-07 | Y |
| MMP2     | 10.576 | 9.797e-10 | 5.046e-07 | N |
| SHC1     | 7.878  | 3.430e-07 | 5.052e-07 | N |
| SAE1     | 7.385  | 9.999e-07 | 5.052e-07 | N |
| KANK2    | 6.179  | 1.362e-05 | 5.052e-07 | N |
| MDH2     | 10.834 | 5.602e-10 | 5.363e-07 | Y |
| LITAF    | 10.448 | 1.291e-09 | 5.453e-07 | N |
| ADAM10   | 6.764  | 3.844e-06 | 5.498e-07 | N |
| PSME1    | 7.096  | 1.869e-06 | 5.963e-07 | N |
| AKR1C3   | 6.224  | 1.234e-05 | 6.104e-07 | N |
| STAT6    | 7.306  | 1.186e-06 | 6.291e-07 | N |
| NREP     | 11.144 | 2.862e-10 | 6.308e-07 | N |
| PNPLA4   | 10.601 | 9.286e-10 | 6.308e-07 | N |
| GRB10    | 9.765  | 5.683e-09 | 6.308e-07 | N |
| DCN      | 9.697  | 6.586e-09 | 6.308e-07 | N |
| PXMP2    | 9.301  | 1.557e-08 | 6.436e-07 | N |
| PABPC3   | 7.969  | 2.812e-07 | 6.436e-07 | N |
| GAMT     | 10.897 | 4.888e-10 | 6.504e-07 | Y |
| KLHDC3   | 15.99  | 8.882e-15 | 6.717e-07 | Y |
| TNFRSF1A | 7.736  | 4.667e-07 | 6.717e-07 | N |
| PRCP     | 6.876  | 3.015e-06 | 6.737e-07 | N |
| TMEM87A  | 11.735 | 7.993e-11 | 6.946e-07 | N |
| FYCO1    | 8.797  | 4.650e-08 | 6.946e-07 | Y |
| CD9      | 6.673  | 4.674e-06 | 6.949e-07 | N |
| CD47     | 8.945  | 3.374e-08 | 6.982e-07 | N |
| COX7A1   | 6.231  | 1.216e-05 | 6.984e-07 | Y |
| STK38    | 6.438  | 7.781e-06 | 7.236e-07 | N |
| CACNA1S  | 6.146  | 1.461e-05 | 7.381e-07 | Y |
| CYC1     | 13.799 | 9.446e-13 | 7.419e-07 | Y |
| ENO3     | 8.356  | 1.212e-07 | 7.645e-07 | Y |
| DHPS     | 8.2    | 1.704e-07 | 7.922e-07 | N |
| CTTN     | 8.24   | 1.562e-07 | 8.214e-07 | N |
| MCTS1    | 7.36   | 1.055e-06 | 8.214e-07 | N |
| FHL3     | 7.227  | 1.408e-06 | 8.214e-07 | Y |
| SLC25A12 | 9.298  | 1.568e-08 | 8.973e-07 | Y |
| PGRMC1   | 6.947  | 2.581e-06 | 9.716e-07 | N |
| SDC2     | 7.261  | 1.309e-06 | 9.821e-07 | N |
| PKD2     | 10.073 | 2.914e-09 | 1.123e-06 | Y |
| RHOA     | 6.377  | 8.872e-06 | 1.135e-06 | N |
| FBLN1    | 6.348  | 9.449e-06 | 1.184e-06 | N |
| FBN1     | 10.091 | 2.802e-09 | 1.211e-06 | N |
| RGS3     | 15.561 | 2.220e-14 | 1.230e-06 | N |

|         |        |           |           |   |
|---------|--------|-----------|-----------|---|
| STAM    | 10.124 | 2.611e-09 | 1.259e-06 | N |
| STAT1   | 8.851  | 4.137e-08 | 1.277e-06 | N |
| DIP2C   | 6.31   | 1.026e-05 | 1.306e-06 | N |
| CHMP5   | 10.379 | 1.499e-09 | 1.312e-06 | N |
| COX6B1  | 6.182  | 1.353e-05 | 1.332e-06 | N |
| VAMP8   | 6.42   | 8.081e-06 | 1.339e-06 | N |
| UBE2D4  | 6.38   | 8.815e-06 | 1.343e-06 | Y |
| CS      | 12.22  | 2.805e-11 | 1.347e-06 | Y |
| DSE     | 8.813  | 4.492e-08 | 1.347e-06 | N |
| SP100   | 8.601  | 7.118e-08 | 1.365e-06 | N |
| ARF4    | 6.618  | 5.272e-06 | 1.395e-06 | N |
| SPAG7   | 12.518 | 1.478e-11 | 1.573e-06 | Y |
| HNRNPR  | 9.459  | 1.104e-08 | 1.586e-06 | N |
| CALD1   | 6.502  | 6.774e-06 | 1.592e-06 | N |
| GYPC    | 6.961  | 2.507e-06 | 1.602e-06 | N |
| TRIM38  | 7.078  | 1.946e-06 | 1.619e-06 | N |
| ATP2B2  | 6.129  | 1.516e-05 | 1.643e-06 | Y |
| TMCO1   | 6.568  | 5.868e-06 | 1.691e-06 | N |
| LMNA    | 7.15   | 1.664e-06 | 1.840e-06 | N |
| ELOVL5  | 6.328  | 9.857e-06 | 1.895e-06 | N |
| GUSB    | 6.685  | 4.561e-06 | 2.102e-06 | N |
| RAB11A  | 9.489  | 1.036e-08 | 2.229e-06 | N |
| CKAP4   | 7.315  | 1.163e-06 | 2.410e-06 | N |
| RAB13   | 6.271  | 1.117e-05 | 2.531e-06 | N |
| ATP5H   | 8.814  | 4.484e-08 | 2.588e-06 | N |
| GNAI3   | 8.365  | 1.191e-07 | 2.588e-06 | N |
| ACADM   | 8.735  | 5.322e-08 | 2.731e-06 | Y |
| ASPN    | 7.668  | 5.406e-07 | 2.872e-06 | N |
| CNN3    | 7.065  | 2.002e-06 | 2.872e-06 | N |
| ETF1    | 8.274  | 1.448e-07 | 2.924e-06 | N |
| ADSL    | 6.715  | 4.272e-06 | 2.986e-06 | Y |
| MARCKS  | 6.665  | 4.763e-06 | 2.999e-06 | N |
| GNAQ    | 7.443  | 8.814e-07 | 3.117e-06 | N |
| EMP3    | 6.494  | 6.887e-06 | 3.168e-06 | N |
| COX10   | 11.192 | 2.580e-10 | 3.383e-06 | Y |
| CEP85   | 11.173 | 2.691e-10 | 3.383e-06 | Y |
| EMP1    | 8.37   | 1.178e-07 | 3.671e-06 | N |
| HNRNPAB | 6.998  | 2.313e-06 | 3.872e-06 | N |
| FBXO3   | 8.742  | 5.245e-08 | 3.944e-06 | N |
| AGFG1   | 11.615 | 1.036e-10 | 3.955e-06 | N |
| AKAP12  | 6.77   | 3.792e-06 | 4.106e-06 | N |
| PICALM  | 7.995  | 2.660e-07 | 4.461e-06 | N |
| TMEM59  | 7.698  | 5.063e-07 | 4.498e-06 | N |
| PHYH    | 8.543  | 8.084e-08 | 4.655e-06 | Y |
| CYR61   | 8.278  | 1.437e-07 | 4.765e-06 | N |
| SEPT11  | 6.307  | 1.031e-05 | 4.774e-06 | N |
| ACO2    | 12.565 | 1.336e-11 | 4.991e-06 | Y |
| PHB2    | 7.796  | 4.095e-07 | 4.991e-06 | N |
| MAP4K4  | 6.131  | 1.508e-05 | 5.030e-06 | N |
| TIMP3   | 6.426  | 7.975e-06 | 5.149e-06 | N |
| SESN1   | 6.771  | 3.785e-06 | 5.159e-06 | N |
| RASGRP3 | 6.603  | 5.446e-06 | 5.261e-06 | Y |
| PDLIM2  | 8.798  | 4.642e-08 | 5.491e-06 | N |
| CCNG1   | 6.241  | 1.189e-05 | 5.506e-06 | N |
| ZNF672  | 9.543  | 9.198e-09 | 5.540e-06 | N |
| DDAH1   | 7.198  | 1.501e-06 | 5.540e-06 | N |
| SLC29A1 | 8.771  | 4.926e-08 | 6.064e-06 | N |
| MYOZ3   | 8.79   | 4.723e-08 | 6.219e-06 | Y |
| HLTF    | 7.22   | 1.430e-06 | 6.219e-06 | N |

|                |        |           |           |   |
|----------------|--------|-----------|-----------|---|
| <b>KCTD12</b>  | 6.722  | 4.205e-06 | 6.473e-06 | N |
| <b>TLE1</b>    | 7.654  | 5.571e-07 | 6.744e-06 | N |
| <b>YWHAB</b>   | 7.652  | 5.600e-07 | 7.639e-06 | N |
| <b>ADD3</b>    | 6.475  | 7.184e-06 | 7.639e-06 | N |
| <b>MRS2</b>    | 6.409  | 8.287e-06 | 8.639e-06 | N |
| <b>NONO</b>    | 8.404  | 1.092e-07 | 8.643e-06 | N |
| <b>ALDOA</b>   | 8.023  | 2.502e-07 | 8.807e-06 | Y |
| <b>SIRT2</b>   | 14.631 | 1.599e-13 | 8.896e-06 | Y |
| <b>DYNLT3</b>  | 6.717  | 4.257e-06 | 9.443e-06 | N |
| <b>SUCLG1</b>  | 10.061 | 2.990e-09 | 9.808e-06 | N |
| <b>MLLT11</b>  | 10.465 | 1.247e-09 | 9.941e-06 | N |
| <b>MRPL48</b>  | 6.365  | 9.099e-06 | 9.941e-06 | N |
| <b>GLRX</b>    | 8.55   | 7.963e-08 | 1.109e-05 | Y |
| <b>SLC25A3</b> | 10.628 | 8.747e-10 | 1.166e-05 | N |
| <b>ADAR</b>    | 6.2    | 1.301e-05 | 1.166e-05 | N |
| <b>SAMM50</b>  | 6.35   | 9.409e-06 | 1.199e-05 | N |
| <b>NDUFS3</b>  | 13.257 | 3.016e-12 | 1.210e-05 | Y |
| <b>MYH7</b>    | 7.532  | 7.259e-07 | 1.288e-05 | Y |
| <b>ANP32B</b>  | 9.309  | 1.530e-08 | 1.292e-05 | N |
| <b>TPI1</b>    | 9.029  | 2.810e-08 | 1.311e-05 | Y |
| <b>SLC39A6</b> | 8.197  | 1.714e-07 | 1.311e-05 | N |
| <b>TCF7L2</b>  | 7.165  | 1.612e-06 | 1.311e-05 | N |
| <b>ABCA1</b>   | 6.874  | 3.025e-06 | 1.311e-05 | N |
| <b>AKAP1</b>   | 8.27   | 1.462e-07 | 1.315e-05 | Y |
| <b>MRPS30</b>  | 9.696  | 6.603e-09 | 1.332e-05 | N |
| <b>IL13RA1</b> | 7.548  | 7.017e-07 | 1.349e-05 | N |
| <b>ACAT1</b>   | 9.717  | 6.314e-09 | 1.450e-05 | N |
| <b>CHCHD3</b>  | 7.692  | 5.138e-07 | 1.452e-05 | Y |
| <b>KCNS3</b>   | 7.731  | 4.721e-07 | 1.508e-05 | Y |
| <b>UBE2L6</b>  | 6.478  | 7.131e-06 | 1.519e-05 | N |
| <b>PGM1</b>    | 7.133  | 1.726e-06 | 1.543e-05 | Y |
| <b>EML1</b>    | 7.713  | 4.902e-07 | 1.549e-05 | N |
| <b>AP3S1</b>   | 7.373  | 1.026e-06 | 1.647e-05 | N |
| <b>GDI2</b>    | 9.85   | 4.728e-09 | 1.749e-05 | N |
| <b>CXCL14</b>  | 8.747  | 5.189e-08 | 1.749e-05 | N |
| <b>NSMCE4A</b> | 9.842  | 4.810e-09 | 1.773e-05 | N |
| <b>TPPP3</b>   | 6.488  | 6.983e-06 | 1.854e-05 | N |
| <b>TMX1</b>    | 8.382  | 1.147e-07 | 1.915e-05 | N |
| <b>SLC16A1</b> | 8.366  | 1.187e-07 | 2.054e-05 | N |
| <b>PLP2</b>    | 10.471 | 1.230e-09 | 2.081e-05 | N |
| <b>SCN1B</b>   | 6.278  | 1.099e-05 | 2.102e-05 | Y |
| <b>WDR1</b>    | 7.611  | 6.114e-07 | 2.193e-05 | N |
| <b>FN1</b>     | 7.878  | 3.424e-07 | 2.277e-05 | N |
| <b>HSPB11</b>  | 8.377  | 1.159e-07 | 2.517e-05 | N |
| <b>RIN2</b>    | 6.99   | 2.352e-06 | 2.532e-05 | N |
| <b>UBE2B</b>   | 6.91   | 2.799e-06 | 2.552e-05 | Y |
| <b>WASF2</b>   | 6.649  | 4.930e-06 | 2.665e-05 | N |
| <b>NAP1L1</b>  | 10.69  | 7.651e-10 | 2.678e-05 | N |
| <b>VAT1</b>    | 6.467  | 7.310e-06 | 2.678e-05 | N |
| <b>MYOM1</b>   | 7.555  | 6.914e-07 | 2.691e-05 | Y |
| <b>CISD1</b>   | 7.554  | 6.930e-07 | 2.700e-05 | N |
| <b>SLC25A4</b> | 12.224 | 2.780e-11 | 2.731e-05 | Y |
| <b>CCT2</b>    | 7.383  | 1.003e-06 | 2.939e-05 | N |
| <b>TRMT112</b> | 9.529  | 9.497e-09 | 2.960e-05 | N |
| <b>MAPK12</b>  | 6.527  | 6.409e-06 | 2.960e-05 | Y |
| <b>LRRC2</b>   | 6.798  | 3.568e-06 | 3.211e-05 | Y |
| <b>FBP2</b>    | 6.231  | 1.217e-05 | 3.324e-05 | Y |
| <b>DDX50</b>   | 6.279  | 1.096e-05 | 3.354e-05 | N |
| <b>TCF12</b>   | 6.982  | 2.394e-06 | 3.364e-05 | N |

|          |        |           |           |   |
|----------|--------|-----------|-----------|---|
| COX5A    | 8.769  | 4.950e-08 | 3.384e-05 | Y |
| MAGED2   | 8.685  | 5.935e-08 | 3.560e-05 | N |
| RAP1B    | 7.334  | 1.117e-06 | 3.590e-05 | N |
| BHLHE41  | 6.196  | 1.313e-05 | 3.592e-05 | Y |
| OXA1L    | 7.446  | 8.759e-07 | 3.887e-05 | N |
| THAP11   | 8.654  | 6.350e-08 | 3.913e-05 | N |
| EIF4E2   | 8.653  | 6.367e-08 | 3.987e-05 | N |
| HADH     | 8.064  | 2.287e-07 | 4.036e-05 | N |
| COX5B    | 8.937  | 3.432e-08 | 4.195e-05 | Y |
| TGOLN2   | 7.757  | 4.454e-07 | 4.244e-05 | N |
| PMP22    | 9.807  | 5.194e-09 | 4.487e-05 | N |
| TP63     | 8.392  | 1.122e-07 | 4.616e-05 | Y |
| COX8A    | 8.409  | 1.082e-07 | 4.686e-05 | Y |
| PPP1R3C  | 6.611  | 5.345e-06 | 4.943e-05 | Y |
| DLG5     | 6.897  | 2.879e-06 | 4.953e-05 | N |
| SNUPN    | 7.851  | 3.634e-07 | 5.110e-05 | N |
| ACTN2    | 8.325  | 1.296e-07 | 5.121e-05 | Y |
| DLD      | 6.199  | 1.302e-05 | 5.147e-05 | N |
| ECHDC2   | 10.337 | 1.645e-09 | 5.638e-05 | N |
| UQCRFS1  | 9.25   | 1.739e-08 | 5.656e-05 | Y |
| RHOBTB1  | 6.492  | 6.919e-06 | 5.660e-05 | Y |
| ATF4     | 6.807  | 3.501e-06 | 5.740e-05 | N |
| MDH1     | 9.438  | 1.157e-08 | 5.785e-05 | N |
| SYPL1    | 7.152  | 1.656e-06 | 5.816e-05 | N |
| PIK3C2B  | 6.445  | 7.656e-06 | 6.168e-05 | N |
| ECSIT    | 7.92   | 3.126e-07 | 6.444e-05 | N |
| MLEC     | 7.617  | 6.036e-07 | 6.501e-05 | N |
| MAP1B    | 6.714  | 4.278e-06 | 6.505e-05 | N |
| DUSP13   | 6.613  | 5.330e-06 | 6.567e-05 | Y |
| MYL3     | 8.637  | 6.584e-08 | 6.923e-05 | Y |
| WDR45B   | 6.573  | 5.813e-06 | 6.982e-05 | N |
| GTPBP8   | 6.874  | 3.027e-06 | 7.026e-05 | N |
| ROCK1    | 7.568  | 6.713e-07 | 7.064e-05 | N |
| ATP5O    | 7.162  | 1.621e-06 | 7.064e-05 | N |
| FKBP3    | 6.549  | 6.120e-06 | 7.078e-05 | Y |
| IDH3B    | 6.642  | 5.000e-06 | 7.389e-05 | N |
| NDUFV1   | 13.756 | 1.037e-12 | 7.407e-05 | Y |
| COQ3     | 7.943  | 2.977e-07 | 7.407e-05 | N |
| SLC25A11 | 10.063 | 2.978e-09 | 7.453e-05 | Y |
| CLIC5    | 6.323  | 9.973e-06 | 7.650e-05 | Y |
| BLVRB    | 6.646  | 4.958e-06 | 8.301e-05 | N |
| PPP1R1A  | 8.705  | 5.678e-08 | 8.435e-05 | Y |
| LPAR1    | 8.388  | 1.132e-07 | 8.872e-05 | N |
| FH       | 8.019  | 2.523e-07 | 9.116e-05 | N |
| SIRT5    | 10.821 | 5.764e-10 | 9.274e-05 | N |
| THYN1    | 7.251  | 1.336e-06 | 9.276e-05 | N |
| MGEA5    | 6.555  | 6.034e-06 | 9.368e-05 | N |
| MPC1     | 8.638  | 6.580e-08 | 9.637e-05 | N |
| TAX1BP1  | 6.929  | 2.688e-06 | 9.739e-05 | N |
| ATP6V1A  | 7.14   | 1.699e-06 | 1.015e-04 | N |
| ATP5G1   | 7.447  | 8.745e-07 | 1.092e-04 | N |
| BCL2     | 6.418  | 8.118e-06 | 1.143e-04 | N |
| ATP2A2   | 7.049  | 2.072e-06 | 1.157e-04 | Y |
| ATP5A1   | 8.937  | 3.431e-08 | 1.201e-04 | N |
| ATP5B    | 12.649 | 1.113e-11 | 1.220e-04 | N |
| AHNAK    | 7.073  | 1.965e-06 | 1.230e-04 | N |
| ABI1     | 6.236  | 1.202e-05 | 1.239e-04 | N |
| RAB22A   | 6.188  | 1.334e-05 | 1.279e-04 | N |
| MRPL15   | 7.641  | 5.730e-07 | 1.280e-04 | Y |

|          |        |           |           |   |
|----------|--------|-----------|-----------|---|
| NDUFB7   | 8.255  | 1.512e-07 | 1.314e-04 | Y |
| MFAP5    | 7.151  | 1.662e-06 | 1.375e-04 | N |
| WSB1     | 6.98   | 2.404e-06 | 1.377e-04 | N |
| HCCS     | 6.241  | 1.189e-05 | 1.410e-04 | N |
| RRAGC    | 8.345  | 1.243e-07 | 1.446e-04 | N |
| MYOT     | 6.903  | 2.843e-06 | 1.562e-04 | Y |
| DLAT     | 8.102  | 2.107e-07 | 1.580e-04 | N |
| HAX1     | 6.965  | 2.486e-06 | 1.600e-04 | N |
| NNT      | 8.938  | 3.426e-08 | 1.637e-04 | Y |
| COX4I1   | 8.746  | 5.199e-08 | 1.672e-04 | N |
| NDUFA10  | 7.777  | 4.266e-07 | 1.677e-04 | N |
| COX7B    | 6.227  | 1.227e-05 | 1.701e-04 | N |
| IRS1     | 6.767  | 3.820e-06 | 1.815e-04 | N |
| TNNT1    | 6.675  | 4.655e-06 | 1.815e-04 | Y |
| TNNC1    | 6.387  | 8.688e-06 | 1.818e-04 | Y |
| PSMG2    | 7.188  | 1.532e-06 | 2.139e-04 | N |
| AES      | 6.171  | 1.383e-05 | 2.142e-04 | N |
| RAB5A    | 8.524  | 8.420e-08 | 2.247e-04 | N |
| ETS2     | 6.979  | 2.410e-06 | 2.269e-04 | N |
| SDHB     | 8.99   | 3.057e-08 | 2.408e-04 | N |
| CLPP     | 7.94   | 2.997e-07 | 2.494e-04 | N |
| ETFDH    | 6.856  | 3.151e-06 | 2.686e-04 | N |
| MYCBP2   | 7.958  | 2.879e-07 | 2.687e-04 | N |
| ERP44    | 7.06   | 2.021e-06 | 2.780e-04 | N |
| UQCRC1   | 13.661 | 1.270e-12 | 2.790e-04 | Y |
| PDGFRL   | 6.344  | 9.524e-06 | 2.805e-04 | N |
| HGSNAT   | 7.387  | 9.960e-07 | 2.951e-04 | N |
| NDUFC1   | 7.613  | 6.097e-07 | 2.957e-04 | Y |
| CKM      | 7.674  | 5.341e-07 | 2.965e-04 | Y |
| MT2A     | 6.568  | 5.873e-06 | 3.490e-04 | N |
| CCDC28B  | 7.257  | 1.319e-06 | 3.541e-04 | Y |
| TCAP     | 6.44   | 7.747e-06 | 3.648e-04 | Y |
| IGF1     | 6.363  | 9.149e-06 | 3.745e-04 | N |
| ARHGEF12 | 7.199  | 1.497e-06 | 3.820e-04 | N |
| TACO1    | 8.701  | 5.734e-08 | 3.848e-04 | N |
| POLR2G   | 6.352  | 9.371e-06 | 3.848e-04 | N |
| PLCL1    | 6.275  | 1.106e-05 | 3.902e-04 | N |
| CKMT2    | 11.001 | 3.903e-10 | 4.630e-04 | Y |
| TRIP12   | 6.248  | 1.172e-05 | 4.704e-04 | N |
| ALDH5A1  | 6.788  | 3.644e-06 | 5.234e-04 | N |
| PTP4A3   | 7.367  | 1.039e-06 | 5.285e-04 | Y |
| TLN2     | 6.665  | 4.764e-06 | 5.606e-04 | N |
| PIIF     | 11.403 | 1.638e-10 | 6.063e-04 | N |
| VDAC1    | 7.029  | 2.161e-06 | 6.188e-04 | Y |
| MAP3K7   | 7.809  | 3.980e-07 | 6.288e-04 | N |
| COQ9     | 10.39  | 1.465e-09 | 6.698e-04 | Y |
| EHBP1    | 6.49   | 6.953e-06 | 6.977e-04 | N |
| KALRN    | 6.35   | 9.405e-06 | 7.448e-04 | N |
| COA7     | 6.399  | 8.467e-06 | 7.920e-04 | N |
| PJA2     | 6.548  | 6.137e-06 | 8.726e-04 | N |
| RPL31    | 6.307  | 1.033e-05 | 9.563e-04 | N |
| GNL2     | 7.701  | 5.036e-07 | 9.750e-04 | N |
| UQCR10   | 6.558  | 6.000e-06 | 1.175e-03 | Y |
| PKM      | 6.132  | 1.506e-05 | 1.379e-03 | Y |
| GOT1     | 9.63   | 7.618e-09 | 1.440e-03 | Y |
| ANK1     | 7.153  | 1.653e-06 | 1.442e-03 | Y |
| DCTPP1   | 6.528  | 6.407e-06 | 1.507e-03 | N |
| ARID4B   | 6.351  | 9.377e-06 | 1.883e-03 | N |
| NDUFA13  | 6.284  | 1.084e-05 | 1.899e-03 | N |



|               |        |           |           |   |
|---------------|--------|-----------|-----------|---|
| <b>HERC1</b>  | 6.231  | 1.217e-05 | 2.055e-03 | N |
| <b>GATM</b>   | 7.51   | 7.612e-07 | 2.127e-03 | N |
| <b>MRPS7</b>  | 6.776  | 3.745e-06 | 2.137e-03 | N |
| <b>GLRX5</b>  | 10.651 | 8.333e-10 | 2.219e-03 | N |
| <b>SEL1L</b>  | 6.211  | 1.270e-05 | 2.311e-03 | N |
| <b>NDUFA8</b> | 7.911  | 3.188e-07 | 2.343e-03 | N |
| <b>DCP2</b>   | 7.098  | 1.861e-06 | 2.361e-03 | N |
| <b>ATP5G3</b> | 8.717  | 5.540e-08 | 2.381e-03 | N |
| <b>GYS1</b>   | 6.307  | 1.033e-05 | 2.390e-03 | Y |
| <b>OFD1</b>   | 6.202  | 1.293e-05 | 2.490e-03 | N |
| <b>MCM6</b>   | 6.317  | 1.010e-05 | 2.511e-03 | N |
| <b>MRPL2</b>  | 6.654  | 4.874e-06 | 2.612e-03 | N |
| <b>ETFB</b>   | 7.488  | 7.991e-07 | 2.636e-03 | N |
| <b>RPP14</b>  | 6.566  | 5.893e-06 | 2.849e-03 | Y |
| <b>TCF4</b>   | 7.307  | 1.183e-06 | 3.155e-03 | N |
| <b>ZC3H7A</b> | 7.023  | 2.194e-06 | 3.173e-03 | N |
| <b>AUH</b>    | 6.415  | 8.178e-06 | 3.415e-03 | N |
| <b>MAN1A2</b> | 6.226  | 1.229e-05 | 3.566e-03 | N |
| <b>MSRB2</b>  | 6.924  | 2.715e-06 | 3.612e-03 | N |
| <b>MRPL16</b> | 6.718  | 4.248e-06 | 3.687e-03 | N |
| <b>NMRK2</b>  | 7.657  | 5.544e-07 | 4.311e-03 | Y |
| <b>COA1</b>   | 6.373  | 8.942e-06 | 4.541e-03 | N |
| <b>GRSF1</b>  | 6.139  | 1.483e-05 | 6.259e-03 | Y |
| <b>UBE2E1</b> | 9.044  | 2.722e-08 | 6.794e-03 | N |
| <b>SMIM7</b>  | 8.592  | 7.265e-08 | 7.021e-03 | N |
| <b>SDHA</b>   | 6.803  | 3.532e-06 | 7.030e-03 | Y |
| <b>MT1G</b>   | 6.158  | 1.423e-05 | 1.040e-02 | N |
| <b>CDK16</b>  | 8.284  | 1.420e-07 | 1.160e-02 | Y |
| <b>NDUFS2</b> | 8.744  | 5.218e-08 | 1.278e-02 | Y |
| <b>PSMB1</b>  | 6.521  | 6.498e-06 | 1.433e-02 | N |
| <b>PDHA1</b>  | 6.421  | 8.072e-06 | 1.490e-02 | Y |
| <b>CRAT</b>   | 7.233  | 1.389e-06 | 1.566e-02 | Y |
| <b>UBAC1</b>  | 6.287  | 1.079e-05 | 1.611e-02 | Y |
| <b>DBI</b>    | 6.254  | 1.157e-05 | 1.611e-02 | N |
| <b>HSPB6</b>  | 7.349  | 1.080e-06 | 1.933e-02 | Y |
| <b>PRRC2C</b> | 6.823  | 3.380e-06 | 1.954e-02 | N |
| <b>ABCA5</b>  | 7.53   | 7.298e-07 | 2.212e-02 | Y |
| <b>AIFM1</b>  | 7.219  | 1.433e-06 | 2.656e-02 | N |
| <b>G0S2</b>   | 6.757  | 3.898e-06 | 3.010e-02 | N |
| <b>GNG5</b>   | 7.232  | 1.393e-06 | 3.562e-02 | N |
| <b>SMAD1</b>  | 6.262  | 1.138e-05 | 3.651e-02 | N |
| <b>PSMA4</b>  | 6.341  | 9.595e-06 | 7.091e-02 | N |
| <b>SFPQ</b>   | 6.273  | 1.111e-05 | 8.704e-02 | N |
| <b>ACADVL</b> | 7.336  | 1.111e-06 | 1.245e-01 | N |
