# Supplementary material for: A machine learning-based clinical tool for diagnosing myopathy using multi-cohort microarray expression profiles
Source: Springer Nature journal article supplement (doi:10.1186/s12967-020-02630-3), 2020-11-30
Supplement: MOESM5 [file 18641996]

**Supplemental Content 5:** Top 5 downregulated biological pathways for 5 categories of muscle disease. Only significant terms (FDR q-val < 0.05) were included in the table. \* ICUAW has no significant downregulated biological processes.

| <b>Disease*</b> | <b>Name</b>                                           | <b>Size</b> | <b>ES</b> | <b>NES</b> | <b>FDR q-val</b> |
|-----------------|-------------------------------------------------------|-------------|-----------|------------|------------------|
| Chronic         | Cytosolic transport                                   | 7           | -0.812    | -1.903     | 0.036            |
| Chronic         | Cellular component assembly involved in morphogenesis | 10          | -0.761    | -1.879     | 0.043            |
| Chronic         | Regionalization                                       | 9           | -0.696    | -1.824     | 0.049            |
| Congenital      | Immune effector process                               | 70          | -0.56     | -2.171     | <0.001           |
| Congenital      | Cytokine mediated signaling pathway                   | 40          | -0.568    | -2.166     | <0.001           |
| Congenital      | Cytoskeleton organization                             | 74          | -0.503    | -2.155     | <0.001           |
| Congenital      | Regulation of apoptotic signaling pathway             | 25          | -0.587    | -2.127     | <0.001           |
| Congenital      | Regulation of peptidyl tyrosine phosphorylation       | 11          | -0.642    | -1.934     | 0.005            |
| Immobile        | Posttranscriptional regulation of gene expression     | 26          | -0.639    | -2.45      | <0.001           |
| Immobile        | Regulation of immune response                         | 40          | -0.569    | -2.273     | <0.001           |
| Immobile        | Defense response to other organism                    | 42          | -0.557    | -2.231     | <0.001           |
| Immobile        | Regulation of cell junction assembly                  | 9           | -0.776    | -2.174     | <0.001           |
| Immobile        | Regulation of immune system process                   | 60          | -0.552    | -2.142     | <0.001           |
| Infmyo          | Muscle cell proliferation                             | 12          | -0.595    | -2.609     | <0.001           |
| Infmyo          | Developmental cell growth                             | 10          | -0.584    | -2.338     | <0.001           |
| Infmyo          | Positive regulation of growth                         | 13          | -0.502    | -2.255     | <0.001           |
| Infmyo          | Smooth muscle cell proliferation                      | 10          | -0.623    | -2.137     | <0.001           |
| Infmyo          | Positive regulation of cell cycle                     | 12          | -0.567    | -2.018     | 0.006            |

Abbreviations: Infmyo – inflammatory myositis, ICUAW – intensive care unit acquired weakness.
